# Supplementary material for: A real-time LAMP-based dual-sample microfluidic chip for rapid and simultaneous detection of multiple waterborne pathogenic bacteria from coastal waters
Source: Royal Society of Chemistry journal article supplement (doi:10.1039/d1ay00492a), 2021-01-01
Supplement: d1ay00492a1.pdf [file d1ay00492a1.pdf]

1 **Real-time LAMP-based dual-sample microfluidic chip for rapid and**  
2 **simultaneous detection of multiple waterborne pathogenic bacteria**  
3 **from coastal waters**

4

5 Jinglei Jin<sup>1, 2</sup>, Lijun Duan<sup>1, 2, 3</sup>, Jiali Fu<sup>1, 2</sup>, Fangchao Chai<sup>1, 2</sup>, Qianjin Zhou<sup>1, 2, \*</sup>,

6 Yaohua Wang<sup>4</sup>, Xinbin Shao<sup>4</sup>, Lei Wang<sup>5</sup>, Maocang Yan<sup>4</sup>, Xiurong Su<sup>1, 2</sup>, Yanjun

7 Zhan<sup>6</sup>, Junhang Pan<sup>6</sup>, Jiong Chen<sup>1, 2, 7, \*</sup>

8

9 1. State Key Laboratory for Managing Biotic and Chemical Threats to the Quality and  
10 Safety of Agro-products, Ningbo University, Ningbo, 315211, China

11 2. School of Marine Sciences, Ningbo University, Ningbo 315832, China

12 3. Ningbo Haishu District Animal Husbandry and Veterinary Medicine Technical  
13 Management Service Station, Ningbo 315153, China

14 4. Zhejiang Key Laboratory of Exploitation and Preservation of Coastal Bio-resource,  
15 Zhejiang Mariculture Research Institute, Wenzhou 325005, China;

16 5. CapitalBio Corporation, 18 Life Science Parkway, Changping District, Beijing  
17 102206, China

18 6. Zhejiang Provincial Center for Disease Control and Prevention, Hangzhou 310009,  
19 China

20 7. Key Laboratory of Applied Marine Biotechnology of Ministry of Education,  
21 Ningbo University, Ningbo 315211, China

22 **Corresponding authors**

23 Qian-jin Zhou, School of Marine Sciences, Meishan Campus, Ningbo University,

24 Ningbo 315832, China. E-mail: mumu2325@163.com

25 Jiong Chen, School of Marine Sciences, Meishan Campus, Ningbo University,

26 Ningbo 315832, China. E-mail: jchen1975@163.com

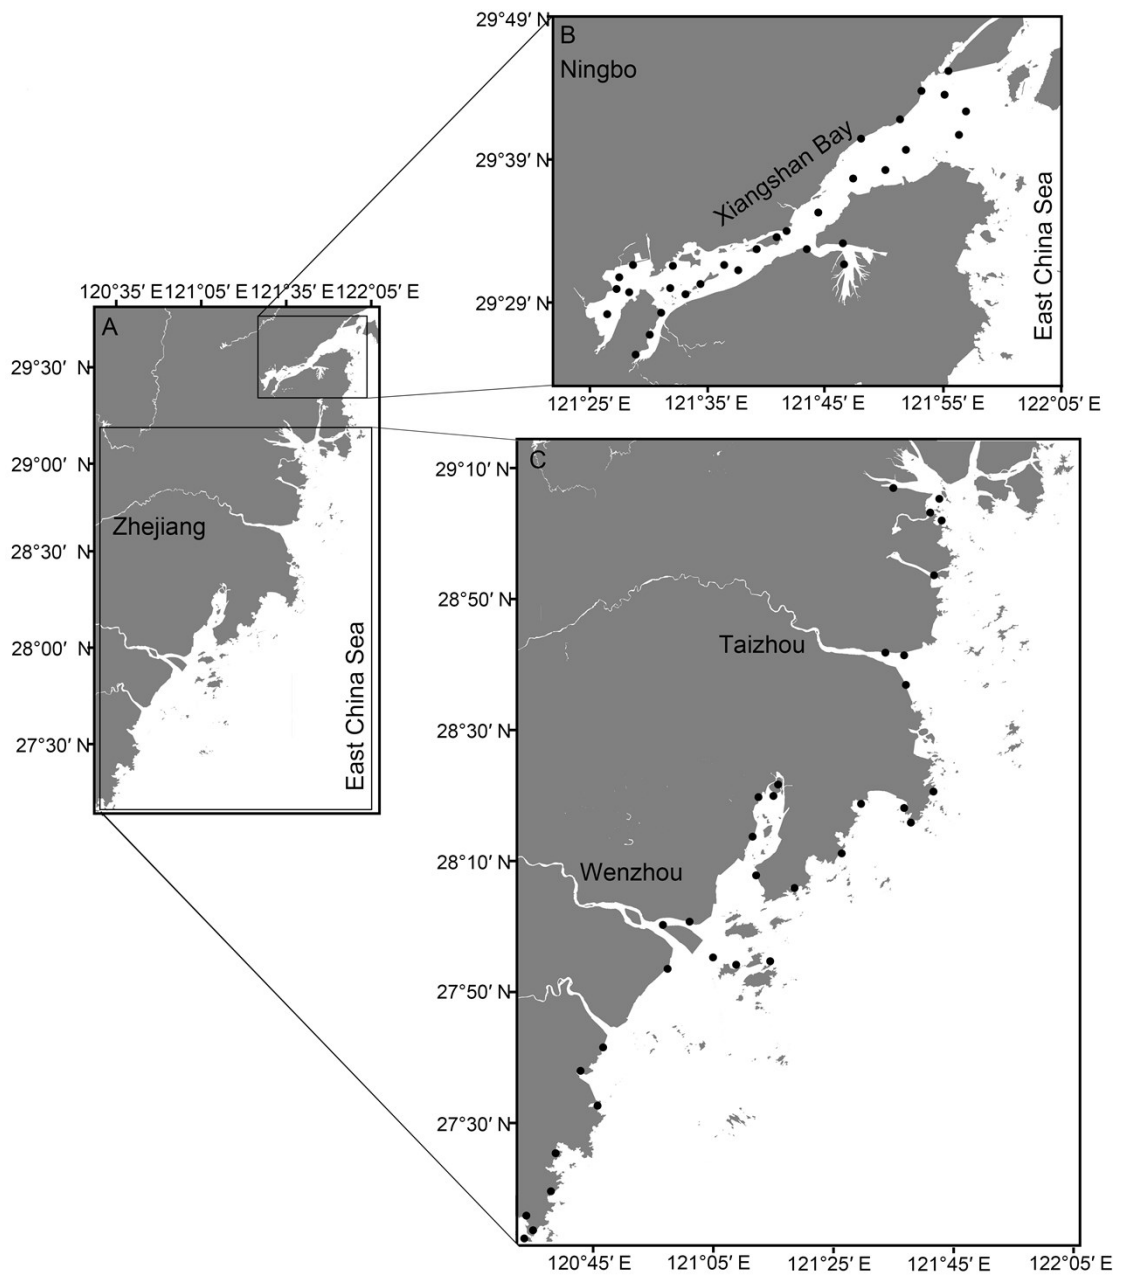

29

30 **Fig. S1** Map of the Xiangshan Bay, Taizhou, and Wenzhou coastal region (A)

31 showing the sampling regions of fisheries, residential areas, or industrial parks (B and

32 C). 64 sampling sites were marked using black dots

33

34

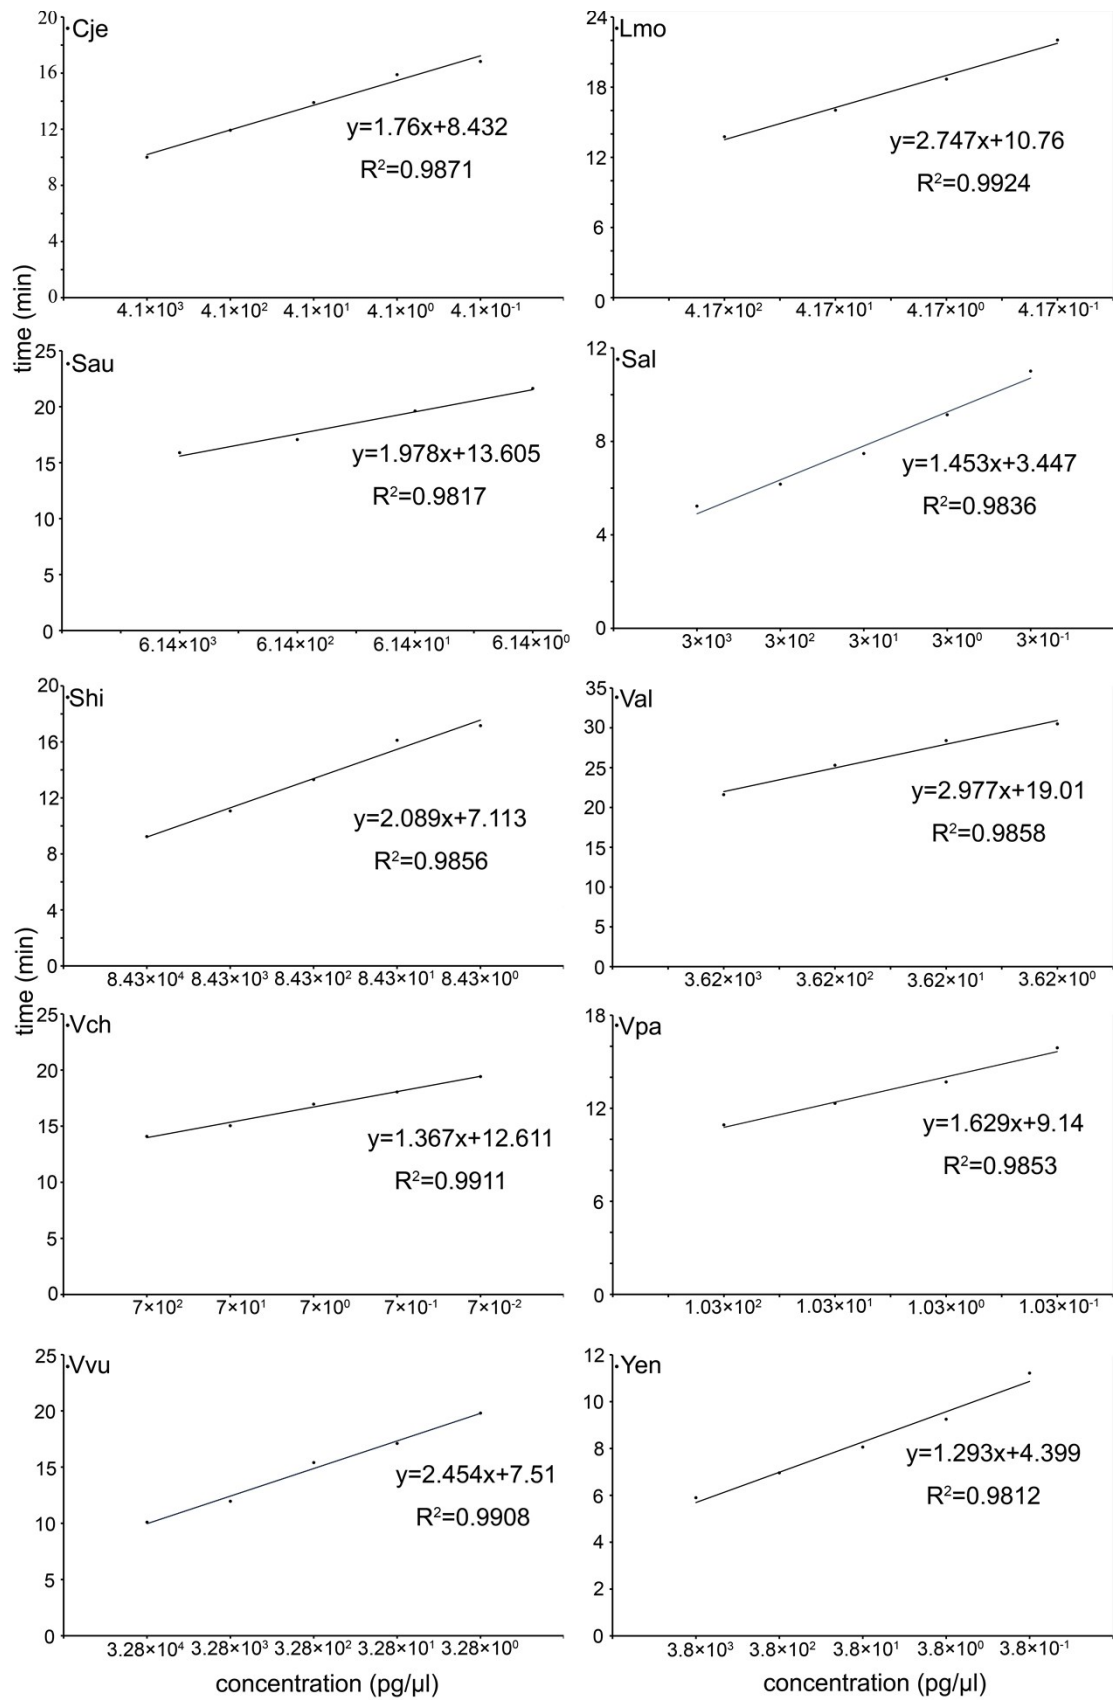

35

36 **Fig. S2** The limits of detection (LOD) of the in-tube LAMP. The correlation between

37 time to amplification and amount of target DNA was determined using the in-tube

38 LAMP. Serially diluted gDNA of each microbe is presented on the X-axis, and time is  
 39 presented on the Y-axis.

40

41

42 **Table S1** Microbial species used in this study.

| Bacteria                      | Isolate/Strain | Source                                                                                                 |
|-------------------------------|----------------|--------------------------------------------------------------------------------------------------------|
| <i>Aeromonas hydrophila</i>   | ATCC 13444     | Purchased from American Type Culture Collection (ATCC)                                                 |
| <i>Aeromonas hydrophila</i>   | ATCC 7966      | Purchased from China General Microbiological Culture Collection Center (CGMCC)                         |
| <i>Aeromonas hydrophila</i>   | ayu-Ah0201     | Isolated and kept in our laboratory                                                                    |
| <i>Campylobacter jejuni</i>   | ATCC 29428     | Purchased from ATCC                                                                                    |
| <i>Campylobacter jejuni</i>   | ATCC 33291     | Provided by Prof. Yan-Jun Zhang (Zhejiang Provincial Center for Disease Control and Prevention, China) |
| <i>Campylobacter jejuni</i>   | -              | Provided by Prof. Yan-Jun Zhang                                                                        |
| <i>Edwardsiella tarda</i>     | MCCC 235       | Purchased from Marine Culture Collection of China (MCCC)                                               |
| <i>Edwardsiella tarda</i>     | Et-CD          | Provided by Prof. Mao-Cang Yan (Zhejiang Mariculture Research Institute, China)                        |
| <i>Escherichia coli</i>       | ATCC 9637      | Purchased from ATCC                                                                                    |
| <i>Listeria monocytogenes</i> | ATCC 19115     | Purchased from Guangdong Microbial Culture Collection Center (GDCCC)                                   |
| <i>Listeria monocytogenes</i> | ATCC 700302    | Purchased from ATCC                                                                                    |
| <i>Listeria monocytogenes</i> | 10403S         | Provided by Prof. Wei-Huan Fang (College of Animal Sciences, Zhejiang University,                      |

|                               |              |                                                                                         |
|-------------------------------|--------------|-----------------------------------------------------------------------------------------|
| <i>Listeria monocytogenes</i> | ZJ364        | China)<br>Provided by Prof. Wei-Huan Fang                                               |
| <i>Nocardia seriolae</i>      | ATCC 43993   | Purchased from ATCC                                                                     |
| <i>Nocardia seriolae</i>      | W060622      | Provided by Prof. Guo-Liang Wang (College of Marine Sciences, Ningbo University, China) |
| <i>Photobacterium damsela</i> | Mm041        | Isolated and kept in our laboratory                                                     |
| <i>Pseudomonas aeruginosa</i> | ATCC 9027    | Purchased from GDCCC                                                                    |
| <i>Pseudomonas putida</i>     | MCCC 1A01082 | Purchased from MCCC                                                                     |
| <i>Proteus vulgaris</i>       | ATCC 13315   | Purchased from ATCC                                                                     |
| <i>Staphylococcus aureus</i>  | ATCC 6538    | Purchased from GDCCC                                                                    |
| <i>Staphylococcus aureus</i>  | ATCC 27325   | Purchased from ATCC                                                                     |
| <i>Salmonella enterica</i>    | ATCC 9150    | Purchased from ATCC                                                                     |
| <i>Salmonella enterica</i>    | ATCC 50041   | Provided by Prof. Yan-Jun Zhang                                                         |
| <i>Shigella flexneri</i>      | ATCC 12022   | Provided by Prof. Yan-Jun Zhang                                                         |
| <i>Streptococcus iniae</i>    | ATCC 29178   | Purchased from ATCC                                                                     |
| <i>Streptococcus iniae</i>    | SO-2         | Provided by Prof. Dong Qian (College of Marine Sciences, Ningbo University, China)      |
| <i>Vibrio alginolyticus</i>   | ATCC 17749   | Purchased from ATCC                                                                     |
| <i>Vibrio alginolyticus</i>   | ATCC 33787   | Purchased from ATCC                                                                     |
| <i>Vibrio alginolyticus</i>   | MCCC 1B00091 | Purchased from MCCC                                                                     |
| <i>Vibrio anguillarum</i>     | ATCC 19264   | Purchased from ATCC                                                                     |
| <i>Vibrio anguillarum</i>     | ayu-H080701  | Isolated and kept in our laboratory                                                     |
| <i>Vibrio campbellii</i>      | GL1008_W02   | Isolated and kept in our laboratory                                                     |
| <i>Vibrio campbellii</i>      | GL1008_W16   | Isolated and kept in our laboratory                                                     |
| <i>Vibrio cholerae</i>        | GL1010_S02   | Isolated and kept in our laboratory                                                     |
| <i>Vibrio cholerae</i>        | -            | Provided by Prof. Yan-Jun Zhang                                                         |
| <i>Vibrio cholerae</i>        | CMCC 4819    | Provided by Prof. Yan-Jun Zhang                                                         |
| <i>Vibrio coralliilyticus</i> | GL1009_W34   | Isolated and kept in our laboratory                                                     |
| <i>Vibrio natriegens</i>      | GL1009_W34   | Isolated and kept in our                                                                |

---

|                                |             |                                                                                             |
|--------------------------------|-------------|---------------------------------------------------------------------------------------------|
| <i>Vibrio fischeri</i>         | ATCC 700601 | laboratory<br>Purchased from ATCC                                                           |
| <i>Vibrio fluvialis</i>        | ATCC 33809  | Purchased from CGMCC                                                                        |
| <i>Vibrio harveyi</i>          | ATCC 14126  | Purchased from ATCC                                                                         |
| <i>Vibrio harveyi</i>          | ATCC 33866  | Purchased from CGMCC                                                                        |
| <i>Vibrio harveyi</i>          | ATCC 33842  | Purchased from CGMCC                                                                        |
| <i>Vibrio ichthyoenteri</i>    | GL1012_S01  | Isolated and kept in our<br>laboratory                                                      |
| <i>Vibrio orientalis</i>       | GL1010_W10  | Isolated and kept in our<br>laboratory                                                      |
| <i>Vibrio orientalis</i>       | GL1010_S07  | Isolated and kept in our<br>laboratory                                                      |
| <i>Vibrio parahaemolyticus</i> | ATCC 33845  | Provided by Prof. Yan-<br>Jun Zhang                                                         |
| <i>Vibrio parahaemolyticus</i> | ATCC 33847  | Provided by Prof. Yan-<br>Jun Zhang                                                         |
| <i>Vibrio parahaemolyticus</i> | O1          | Provided by Prof. Yan-<br>Jun Zhang                                                         |
| <i>Vibrio parahaemolyticus</i> | O2          | Provided by Prof. Yan-<br>Jun Zhang                                                         |
| <i>Vibrio parahaemolyticus</i> | O3          | Provided by Prof. Yan-<br>Jun Zhang                                                         |
| <i>Vibrio rotiferianus</i>     | CAIM 577    | Purchased from the<br>Belgian Co-Ordinated<br>Collection of<br>Microorganisms<br>(BCCM/LMG) |
| <i>Vibrio rotiferianus</i>     | GL1009_W24  | Isolated and kept in our<br>laboratory                                                      |
| <i>Vibrio splendidus</i>       | Vs-So       | Provided by Prof. Mao-<br>Cang Yan                                                          |
| <i>Vibrio tubiashii</i>        | GL1011_C02  | Isolated and kept in our<br>laboratory                                                      |
| <i>Vibrio vulnificus</i>       | ATCC 27562  | Purchased from CGMCC                                                                        |
| <i>Yersinia enterocolitica</i> | ATCC 23715  | Provided by Prof. Yan-<br>Jun Zhang                                                         |

---

44

45 **Table S2** Status of seawater samples collected in this study

| Sampling Time  | Sampling Site  | Xiangshan bay   | Wenzhou | Taizhou <sup>b</sup> |
|----------------|----------------|-----------------|---------|----------------------|
|                | Samples Counts | in Ningbo       |         |                      |
| September 2018 |                | 31              | -       | -                    |
| April 2019     |                | 30              | -       | -                    |
| July 2019      |                | 12 <sup>a</sup> | -       | -                    |
| September 2019 |                | -               | 18      | 15                   |
| April 2020     |                | -               | 18      | -                    |

46 <sup>a</sup> These samples were collected due to local official temporary requirement.

47 <sup>b</sup> No samples were collected from these sampling sites in April 2020, due to epidemic  
48 prevention against COVID-19.

49

50

51 **Table S3** Layout of the primer sets in the dual-sample chip corresponding to 10 tested  
52 bacteria

| No. of the reaction wells <sup>a</sup> | Pathogens                   |
|----------------------------------------|-----------------------------|
| 1, 12                                  | inner positive control (PC) |
| 2, 13                                  | <i>V. parahaemolyticus</i>  |
| 3, 14                                  | <i>V. cholerae</i>          |
| 4, 15                                  | <i>V. vulnificus</i>        |
| 5, 16                                  | <i>V. alginolyticus</i>     |
| 6, 17                                  | <i>S. enterica</i>          |
| 7, 18                                  | <i>S. flexneri</i>          |
| 8, 19                                  | <i>C. jejuni</i>            |
| 9, 20                                  | <i>S. aureus</i>            |
| 10, 21                                 | <i>Y. enterocolitica</i>    |
| 11, 22                                 | <i>L. monocytogenes</i>     |

53 <sup>a</sup> The reaction wells from No. 1 to No. 11 are located in Half I of the dual-sample

54 chip; in contrast, the reaction wells from No. 12 to No. 22 are located in Half II

55



56 **Table S4** Comparison of on-chip LAMP assay with conventional microbiological methods and conventional PCR assays.

| Sample collection region | Sample number | Conventional microbiological methods | On-chip LAMP               | PCR assays                 |
|--------------------------|---------------|--------------------------------------|----------------------------|----------------------------|
|                          | HX-1901-003   | <i>V. parahaemolyticus</i>           | <i>V. parahaemolyticus</i> | <i>V. parahaemolyticus</i> |
|                          | HX-1901-007   | <i>V. parahaemolyticus</i>           | <i>V. parahaemolyticus</i> | Negative                   |
|                          | HX-1901-008   | <i>V. parahaemolyticus</i>           | <i>V. parahaemolyticus</i> | Negative                   |
|                          | HX-1901-0014  | <i>V. parahaemolyticus</i>           | <i>V. parahaemolyticus</i> | <i>V. parahaemolyticus</i> |
|                          | HX-1901-022   | <i>V. parahaemolyticus</i>           | Negative                   | Negative                   |
|                          | HX-1901-0030  | <i>V. parahaemolyticus</i>           | <i>V. parahaemolyticus</i> | <i>V. parahaemolyticus</i> |
|                          | HX-1904-004   | <i>V. parahaemolyticus</i>           | <i>V. parahaemolyticus</i> | <i>V. parahaemolyticus</i> |
|                          | HX-1904-007   | <i>V. parahaemolyticus</i>           | <i>V. parahaemolyticus</i> | <i>V. parahaemolyticus</i> |
|                          | HX-1904-009   | <i>V. parahaemolyticus</i>           | <i>V. parahaemolyticus</i> | <i>V. parahaemolyticus</i> |
|                          | HX-1904-0016  | <i>V. parahaemolyticus</i>           | <i>V. parahaemolyticus</i> | <i>V. parahaemolyticus</i> |
| Xiangshan Bay            | HX-1904-0027  | Negative                             | <i>V. vulnificus</i>       | Negative                   |
|                          | HX-1904-0028  | Negative                             | Negative                   | <i>V. alginolyticus</i>    |
|                          | HX-1904-0030  | <i>V. vulnificus</i>                 | <i>V. vulnificus</i>       | <i>V. vulnificus</i>       |
|                          | HX-1907-006   | <i>V. vulnificus</i>                 | <i>V. vulnificus</i>       | <i>V. vulnificus</i>       |
|                          | HX-1901-001   | Negative                             | Negative                   | Negative                   |
|                          | HX-1901-002   | Negative                             | Negative                   | Negative                   |
|                          | HX-1901-004   | Negative                             | Negative                   | Negative                   |
|                          | HX-1901-005   | Negative                             | Negative                   | Negative                   |
|                          | HX-1901-006   | Negative                             | Negative                   | Negative                   |
|                          | HX-1901-009   | Negative                             | Negative                   | Negative                   |
|                          | HX-1901-010   | Negative                             | Negative                   | Negative                   |

---

|             |          |          |          |
|-------------|----------|----------|----------|
| HX-1901-011 | Negative | Negative | Negative |
| HX-1901-012 | Negative | Negative | Negative |
| HX-1901-013 | Negative | Negative | Negative |
| HX-1901-015 | Negative | Negative | Negative |
| HX-1901-016 | Negative | Negative | Negative |
| HX-1901-017 | Negative | Negative | Negative |
| HX-1901-018 | Negative | Negative | Negative |
| HX-1901-019 | Negative | Negative | Negative |
| HX-1901-020 | Negative | Negative | Negative |
| HX-1901-021 | Negative | Negative | Negative |
| HX-1901-023 | Negative | Negative | Negative |
| HX-1901-024 | Negative | Negative | Negative |
| HX-1901-025 | Negative | Negative | Negative |
| HX-1901-026 | Negative | Negative | Negative |
| HX-1901-027 | Negative | Negative | Negative |
| HX-1901-028 | Negative | Negative | Negative |
| HX-1901-029 | Negative | Negative | Negative |
| HX-1901-031 | Negative | Negative | Negative |
| HX-1904-001 | Negative | Negative | Negative |
| HX-1904-002 | Negative | Negative | Negative |
| HX-1904-003 | Negative | Negative | Negative |
| HX-1904-005 | Negative | Negative | Negative |
| HX-1904-006 | Negative | Negative | Negative |
| HX-1904-008 | Negative | Negative | Negative |
| HX-1904-010 | Negative | Negative | Negative |

---

---

|             |          |          |          |
|-------------|----------|----------|----------|
| HX-1904-011 | Negative | Negative | Negative |
| HX-1904-012 | Negative | Negative | Negative |
| HX-1904-013 | Negative | Negative | Negative |
| HX-1904-014 | Negative | Negative | Negative |
| HX-1904-015 | Negative | Negative | Negative |
| HX-1904-017 | Negative | Negative | Negative |
| HX-1904-018 | Negative | Negative | Negative |
| HX-1904-019 | Negative | Negative | Negative |
| HX-1904-020 | Negative | Negative | Negative |
| HX-1904-021 | Negative | Negative | Negative |
| HX-1904-022 | Negative | Negative | Negative |
| HX-1904-023 | Negative | Negative | Negative |
| HX-1904-024 | Negative | Negative | Negative |
| HX-1904-025 | Negative | Negative | Negative |
| HX-1904-026 | Negative | Negative | Negative |
| HX-1904-029 | Negative | Negative | Negative |
| HX-1907-001 | Negative | Negative | Negative |
| HX-1907-002 | Negative | Negative | Negative |
| HX-1907-003 | Negative | Negative | Negative |
| HX-1907-004 | Negative | Negative | Negative |
| HX-1907-005 | Negative | Negative | Negative |
| HX-1907-007 | Negative | Negative | Negative |
| HX-1907-008 | Negative | Negative | Negative |
| HX-1907-009 | Negative | Negative | Negative |
| HX-1907-010 | Negative | Negative | Negative |

---

|         |              |                                       |                                       |                                       |
|---------|--------------|---------------------------------------|---------------------------------------|---------------------------------------|
|         | HX-1907-011  | Negative                              | Negative                              | Negative                              |
|         | HX-1907-012  | Negative                              | Negative                              | Negative                              |
|         | WZ-2005-002  | <i>V. vulnificus</i>                  | <i>V. vulnificus</i>                  | Negative                              |
|         | WZ-2005-003  | <i>V. vulnificus</i>                  | <i>V. vulnificus</i>                  | <i>V. vulnificus</i>                  |
|         | WZ-2005-007  | <i>V. vulnificus</i>                  | <i>V. vulnificus</i>                  | <i>V. vulnificus</i>                  |
|         | WZ-2005-0010 | <i>V. vulnificus</i>                  | Negative                              | Negative                              |
|         | WZ-2005-016  | <i>V. vulnificus</i>                  | <i>V. vulnificus</i>                  | <i>V. vulnificus</i>                  |
|         | WZ-2006-001  | <i>V. vulnificus</i>                  | <i>V. vulnificus</i>                  | <i>V. vulnificus</i>                  |
|         | WZ-2006-002  | <i>V. vulnificus</i>                  | <i>V. vulnificus</i>                  | <i>V. vulnificus</i>                  |
|         | WZ-2006-003  | <i>V. vulnificus</i>                  | <i>V. vulnificus</i>                  | <i>V. vulnificus</i>                  |
|         | WZ-2008-004  | <i>V. vulnificu, L. monocytogenes</i> | <i>V. vulnificu, L. monocytogenes</i> | <i>V. vulnificu, L. monocytogenes</i> |
|         | WZ-2008-006  | Negative                              | <i>V. parahaemolyticus</i>            | <i>V. parahaemolyticus</i>            |
| Wenzhou | WZ-2008-007  | Negative                              | Negative                              | <i>V. parahaemolyticus</i>            |
|         | WZ-2005-001  | Negative                              | Negative                              | Negative                              |
|         | WZ-2005-003  | Negative                              | Negative                              | Negative                              |
|         | WZ-2005-005  | Negative                              | Negative                              | Negative                              |
|         | WZ-2005-006  | Negative                              | Negative                              | Negative                              |
|         | WZ-2005-008  | Negative                              | Negative                              | Negative                              |
|         | WZ-2005-009  | Negative                              | Negative                              | Negative                              |
|         | WZ-2005-011  | Negative                              | Negative                              | Negative                              |
|         | WZ-2005-012  | Negative                              | Negative                              | Negative                              |
|         | WZ-2005-013  | Negative                              | Negative                              | Negative                              |
|         | WZ-2005-014  | Negative                              | Negative                              | Negative                              |
|         | WZ-2005-015  | Negative                              | Negative                              | Negative                              |

|         |              |                                         |                                         |                                         |
|---------|--------------|-----------------------------------------|-----------------------------------------|-----------------------------------------|
|         | WZ-2005-017  | Negative                                | Negative                                | Negative                                |
|         | WZ-2005-018  | Negative                                | Negative                                | Negative                                |
|         | WZ-2006-004  | Negative                                | Negative                                | Negative                                |
|         | WZ-2006-005  | Negative                                | Negative                                | Negative                                |
|         | WZ-2006-006  | Negative                                | Negative                                | Negative                                |
|         | WZ-2006-007  | Negative                                | Negative                                | Negative                                |
|         | WZ-2006-008  | Negative                                | Negative                                | Negative                                |
|         | WZ-2008-001  | Negative                                | Negative                                | Negative                                |
|         | WZ-2008-002  | Negative                                | Negative                                | Negative                                |
|         | WZ-2008-003  | Negative                                | Negative                                | Negative                                |
|         | WZ-2008-005  | Negative                                | Negative                                | Negative                                |
|         | WZ-2008-008  | Negative                                | Negative                                | Negative                                |
|         | WZ-2008-009  | Negative                                | Negative                                | Negative                                |
|         | WZ-2008-0010 | Negative                                | Negative                                | Negative                                |
|         | TZ-1910-001  | <i>V. alginolyticus</i>                 | <i>V. alginolyticus</i>                 | Negative                                |
|         | TZ-1910-004  | <i>V. parahaemolyticus, S. enterica</i> | <i>V. parahaemolyticus, S. enterica</i> | <i>V. parahaemolyticus, S. enterica</i> |
|         | TZ-1910-009  | <i>V. parahaemolyticus, S. enterica</i> | <i>V. parahaemolyticus, S. enterica</i> | <i>V. parahaemolyticus, S. enterica</i> |
| Taizhou | TZ-1910-0013 | <i>V. parahaemolyticus, S. enterica</i> | <i>V. parahaemolyticus, S. enterica</i> | <i>V. parahaemolyticus, S. enterica</i> |
|         | TZ-1910-0015 | Negative                                | Negative                                | <i>V. parahaemolyticus</i>              |
|         | TZ-1910-002  | Negative                                | Negative                                | Negative                                |
|         | TZ-1910-003  | Negative                                | Negative                                | Negative                                |
|         | TZ-1910-005  | Negative                                | Negative                                | Negative                                |

---

|             |          |          |          |
|-------------|----------|----------|----------|
| TZ-1910-006 | Negative | Negative | Negative |
| TZ-1910-007 | Negative | Negative | Negative |
| TZ-1910-008 | Negative | Negative | Negative |
| TZ-1910-010 | Negative | Negative | Negative |
| TZ-1910-011 | Negative | Negative | Negative |
| TZ-1910-012 | Negative | Negative | Negative |
| TZ-1910-014 | Negative | Negative | Negative |

---

57

58
